# Supplementary material
Source: PubMed Central journal article supplement (PMC1847405)

## *Supporting Information*

# **Coumaroyl Iridoids and a Depside from Cranberry (*Vaccinium macrocarpon*)**

Allison Turner,<sup>†</sup> Shao-Nong Chen,<sup>†</sup> Dejan Nikolic, Richard van Breemen,  
Norman R. Farnsworth, and Guido F. Pauli\*

*UIC/NIH Center for Botanical Dietary Supplements Research, Department of Medicinal  
Chemistry and Pharmacognosy (MC 781) and PCRPS, College of Pharmacy, University of  
Illinois at Chicago, 833 S. Wood St., Chicago, IL 60612*

\*To whom correspondence should be addressed. Tel: 312-355-1949. Fax: 312-355-2693. E-mail:  
gfp@uic.edu

<sup>†</sup> Equally contributing authors

**S1. HPLC chromatogram of the studied cranberry juice concentrate.** The two lots of cranberry juice concentrate fractionated for this research are shown. Benzoic acid elutes at 39.6 minutes and 10-*p-trans*-coumaroyl-1*S*-dihydromonotropein (**1**) elutes at 35.44 minutes with this method. Other known cranberry compounds ideoin chloride (cyanidin-3-galactoside chloride; Chromadex, Santa Ana CA) and resveratrol (Sigma) have retention times of 30.01 and 37.10, respectively. Column: GROM-SIL 120 prep column (ODS-4 HE 5  $\mu$ , 200 x 20 mm); Gradient: 10:90 (MeOH:0.5%TFA in H<sub>2</sub>O) to 90:10 in 30 minutes; held at 90:10 for 20 minutes. PDA detection, 200 to 400 nm. The chromatogram for lot 1 (Ocean Spray T073101) has been shifted down by 1.0 au for ease of comparison with lot 2 (Ocean Spray T111802).

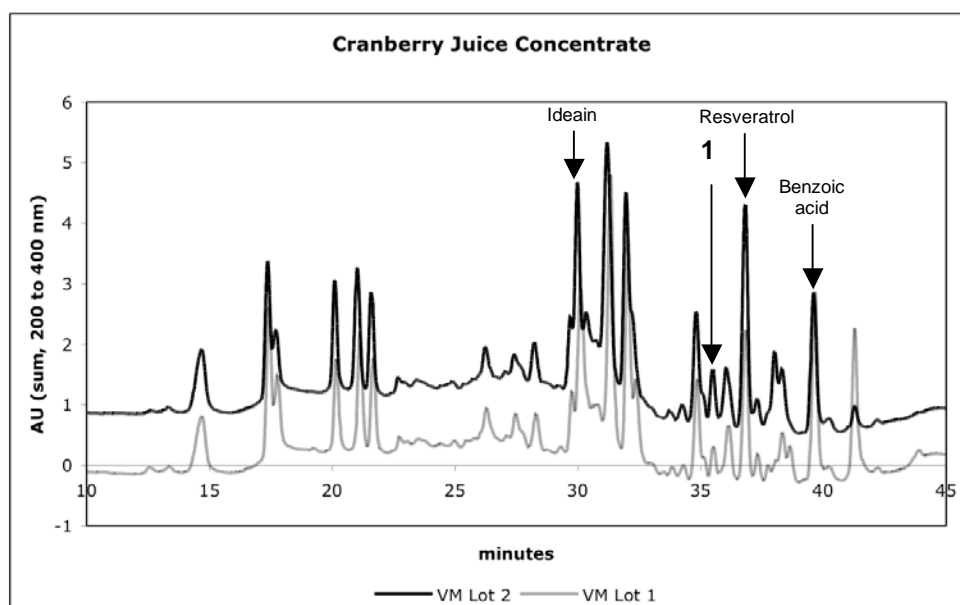

Supplement: NIHMS14942-supplement.pdf [file NIHMS14942-supplement.pdf]
